# Supplementary material
Source: Elsevier journal article supplement (https://www.sochitran.cl/wp-content/uploads/2025/07/mmc1.pdf)
Supplement: mmc1 [file mmc1.pdf]

# THE LANCET

## Infectious Diseases

### Supplementary appendix 1

This translation in Spanish was submitted by the authors and we reproduce it as supplied. It has not been peer reviewed. *The Lancet's* editorial processes have only been applied to the original in English, which should serve as reference for this manuscript.

Los autores nos proporcionaron esta traducción al español y la reproducimos tal como nos fue entregada. No la hemos revisado. Los procesos editoriales de *The Lancet* se han aplicado únicamente al original en inglés, que debe servir de referencia para este manuscrito.

Supplement to: Torres JP, Sauré D, Goic M, et al. Effectiveness and impact of nirsevimab in Chile during the first season of a national immunisation strategy against RSV (NIRSE-CL): a retrospective observational study. *Lancet Infect Dis* 2025; published online June 10. [https://doi.org/10.1016/S1473-3099\(25\)00233-6](https://doi.org/10.1016/S1473-3099(25)00233-6).

# **Efectividad e impacto de nirsevimab en Chile durante la primera temporada de una estrategia nacional de inmunización contra el VRS (NIRSE-CL): un estudio observacional retrospectivo.**

## **RESUMEN**

### **Antecedentes**

Nirsevimab para la prevención del virus respiratorio sincicial (VRS) fue introducido en algunos países del hemisferio norte en 2023. Chile fue el primero en implementar una estrategia universal en el hemisferio sur. Nuestro objetivo fue evaluar la efectividad e impacto de nirsevimab durante la temporada de VRS 2024 en Chile.

### **Métodos**

La implementación de la estrategia comenzó el 1 de abril de 2024 y terminó el 30 de septiembre de 2024, dirigida a lactantes nacidos entre el 1 de abril de 2024 y el 30 de septiembre de 2024 (cohorte estacional de recién nacidos), y lactantes nacidos entre el 1 de octubre de 2023 y el 31 de marzo de 2024 (cohorte de rezago). Usando datos históricos de vigilancia y de egresos hospitalarios de diez hospitales que realizan testeo universal de VRS para todos los pacientes admitidos por infección del tracto respiratorio inferior (ITRI), identificamos un conjunto de códigos CIE-10 más estrechamente relacionados con admisiones por VRS durante las temporadas de VRS de 2019, 2022 y 2023. Estos códigos fueron aplicados a una base de datos nacional de tres registros gubernamentales consolidados a nivel nacional para identificar hospitalizaciones por ITRI relacionadas con VRS (criterio de valoración primario) entre lactantes que recibieron o no recibieron nirsevimab. Los criterios de valoración secundarios fueron admisión a UCI relacionada con VRS, hospitalización por ITRI por cualquier causa y hospitalización por cualquier causa ocurrida al menos 7 días después del nacimiento. La efectividad de nirsevimab se estimó usando un modelo de riesgos proporcionales de Cox estratificado, calculada como  $(1 - \text{razón de riesgo})$  multiplicado por 100, con IC del 95%. También evaluamos el impacto de nirsevimab estimando, en comparación con un escenario contrafactual en el cual nirsevimab nunca fue introducido, el número evitado y la reducción relativa de casos, y el número necesario a inmunizar para evitar un caso. Este estudio fue registrado en ClinicalTrials.gov, NCT06511687 (completado).

### **Resultados**

Se extrajeron datos de 157.709 lactantes con registros completos de la base de datos consolidada. Después de excluir a 1.247 lactantes con datos faltantes o corruptos y a 2.289 lactantes cuya condición de inmunización no pudo determinarse, se incluyeron 154.173 lactantes en el análisis primario. La edad

mediana de los lactantes fue de 6,27 meses (RIC 3,20–9,17). 76.045 (49,32%) de los lactantes eran de sexo femenino y 78.128 (50,68%) de sexo masculino. 145.087 lactantes fueron inmunizados al final de la implementación de la estrategia, con 72.246 (49,79%) en la cohorte de rezago y 72.841 (50,21%) en la cohorte estacional. Después de ajustar por edad, sexo, área geográfica y semanas de edad gestacional, la efectividad combinada de nirsevimab (para las cohortes de rezago y estacional) contra hospitalizaciones por ITRI relacionadas con VRS fue de 76,41% (IC 95%: 72,57–79,72), contra admisiones a UCI relacionadas con VRS fue de 84,94% (IC 95%: 79,47–88,95), contra hospitalizaciones por ITRI por cualquier causa fue de 66,50% (61,97–70,50), y contra hospitalizaciones por cualquier causa fue de 47,90% (44,35–51,21). Estimamos una reducción relativa de 77,46% en hospitalizaciones por ITRI relacionadas con VRS, 30,05 casos evitados por cada 1.000 y un número necesario a inmunizar para evitar una hospitalización por ITRI relacionada con VRS de 35.

### **Interpretación**

La estrategia de inmunización con nirsevimab de Chile redujo significativamente las hospitalizaciones por ITRI relacionadas con VRS y los casos más severos que requirieron cuidados intensivos. Nuestros hallazgos indican un impacto más amplio en salud pública, con reducciones también observadas en hospitalizaciones por ITRI por cualquier causa. Estos resultados podrían alentar a otros países a avanzar en los esfuerzos de prevención del VRS.

### **Financiamiento**

Instituto Sistemas Complejos de Ingeniería (grant ANID PIA/PUENTE AFB230002) y el Ministerio de Salud de Chile.
